# Supplementary material for: Uptake of oral fluid-based HIV self-testing among men who have sex with men and transgender women in Thailand
Source: PubMed Central journal article supplement (PMC8367007; doi:10.1371/journal.pone.0256094), 2021-08-16
Supplement: pone.0256094.s004.pdf [file pone.0256094.s004.pdf]

**CODEBOOK FINAL DATASET ORAL FLUID STUDY**

| Variable Name           | Variable Label                                 | Answer Label     | Answer Code | Variable Type | Notes                                                               | Data collection Tools  |
|-------------------------|------------------------------------------------|------------------|-------------|---------------|---------------------------------------------------------------------|------------------------|
| <b>city</b>             | City research site                             | BANGKOK          | 1           | Numeric       |                                                                     | <b>Enrolment Tools</b> |
|                         |                                                | CHIANG-MAI       | 2           |               |                                                                     |                        |
|                         |                                                | PATTAYA          | 3           |               |                                                                     |                        |
| <b>recruit</b>          | Type recruitment - consent done through        | Face-to-Face     | 1           | Numeric       |                                                                     |                        |
|                         |                                                | Social Media     | 2           |               |                                                                     |                        |
| <b>deidentifiedcode</b> | Code participant deidentified                  | Open ended       |             | long          | This is not an identifier                                           |                        |
| <b>optionhivtest</b>    | HIV test option selected                       | Assisted HIVST   | 1           | Numeric       | Option 1-3: for participnats enrolled under the community approach  |                        |
|                         |                                                | Unassisted HIVST | 2           |               | Option 4: only for participants enrolled under the drop-in approach |                        |
|                         |                                                | Referral to HTC  | 3           |               |                                                                     |                        |
| <b>deliverykit</b>      | Kit delivery options HIVST only                | Directly Given   | 1           | Numeric       |                                                                     |                        |
|                         |                                                | Pick-up Site     | 2           |               |                                                                     |                        |
|                         |                                                | EMS              | 3           |               |                                                                     |                        |
|                         |                                                | N/A              | 5           |               |                                                                     |                        |
|                         |                                                |                  |             |               |                                                                     |                        |
| <b>kp</b>               | Key populations                                | MSM              | 1           | Numeric       | men who have sex with men                                           |                        |
|                         |                                                | MSW              | 2           |               | male sex workers                                                    |                        |
|                         |                                                | TG               | 3           |               | transgender women                                                   |                        |
|                         |                                                | TGSW             | 4           |               | transgender women sex workers                                       |                        |
| <b>msmtg</b>            | MSM vs. TG                                     | MSM              | 1           | Numeric       | MSM = MSM + MSW                                                     |                        |
|                         |                                                | TG               | 2           |               | TG = TG + TGSW                                                      |                        |
| <b>sexwork</b>          | Reported sex work in past 3m                   | No               | 0           | Numeric       |                                                                     |                        |
|                         |                                                | Yes              | 1           |               |                                                                     |                        |
| <b>clientsex</b>        | Reported as a client of sex workers in past 3m | No               | 0           | Numeric       |                                                                     |                        |
|                         |                                                | Yes              | 1           |               |                                                                     |                        |

**Constructed with questions from Questionnaire**

| Variable Name          | Variable Label               | Answer Label       | Answer Code | Variable Type | Notes                                                                                     | Data collection Tools |                       |                       |
|------------------------|------------------------------|--------------------|-------------|---------------|-------------------------------------------------------------------------------------------|-----------------------|-----------------------|-----------------------|
| <b>oralresults</b>     | Result OraQuick              | Negative           | 0           | Numeric       | Result OraQuick under community and drop-in center approach                               | Constructed with CRFs |                       |                       |
|                        |                              | Reactive           | 1           |               |                                                                                           |                       |                       |                       |
|                        |                              | Invalid            | 2           |               |                                                                                           |                       |                       |                       |
|                        |                              | Can't be read      | 3           |               |                                                                                           |                       |                       |                       |
|                        |                              | N/A                | 99          |               |                                                                                           |                       |                       |                       |
| <b>bloodresults</b>    | Blood test result_DIC only   | Negative           | 0           | Numeric       | Result HIV testing under drop-in center approach only                                     |                       | Constructed with CRFs |                       |
|                        |                              | Positive           | 1           |               |                                                                                           |                       |                       |                       |
|                        |                              | Indeterminate      | 2           |               |                                                                                           |                       |                       |                       |
|                        |                              | Not confirmed yet  | 97          |               |                                                                                           |                       |                       |                       |
|                        |                              | N/A                | 99          |               |                                                                                           |                       |                       |                       |
| <b>linkagehtc</b>      | Status Linkages to HTC       | Linked             | 1           | Numeric       | If not reactive/invalid/positive==> N/A                                                   | Constructed with CRFs |                       |                       |
|                        |                              | N/A                | 99          |               |                                                                                           |                       |                       |                       |
|                        |                              | LTFU               | 100         |               |                                                                                           |                       |                       |                       |
| <b>statusconfirm</b>   | Status HIV confirmatory test | Pending            | 0           | Numeric       | Status at the end of the study - No more "Pending"                                        |                       |                       | Constructed with CRFs |
|                        |                              | Confirmed          | 1           |               |                                                                                           |                       |                       |                       |
|                        |                              | Known HIV Positive | 2           |               |                                                                                           |                       |                       |                       |
|                        |                              | N/A                | 99          |               |                                                                                           |                       |                       |                       |
|                        |                              | LTFU               | 100         |               |                                                                                           |                       |                       |                       |
| <b>resultconfirmed</b> | Result confirmatory test     | Negative           | 0           | Numeric       | Result of the confirmatory test                                                           |                       | Constructed with CRFs |                       |
|                        |                              | Positive           | 1           |               |                                                                                           |                       |                       |                       |
|                        |                              | Pending            | 97          |               |                                                                                           |                       |                       |                       |
|                        |                              | N/A                | 99          |               |                                                                                           |                       |                       |                       |
|                        |                              | LTFU               | 100         |               |                                                                                           |                       |                       |                       |
| <b>hivstatus</b>       | Final HIV status             | Negative           | 0           | Numeric       | HIV Status final for all participants afer confirmatory HIV testing when it was necessary | Constructed with CRFs |                       |                       |
|                        |                              | Positive           | 1           |               |                                                                                           |                       |                       |                       |
|                        |                              | Indeterminate      | 2           |               |                                                                                           |                       |                       |                       |
|                        |                              | Not tested yet     | 96          |               |                                                                                           |                       |                       |                       |
|                        |                              | Pending            | 97          |               |                                                                                           |                       |                       |                       |
|                        |                              | LTFU               | 100         |               |                                                                                           |                       |                       |                       |
| <b>typehtcservices</b> | Type of HTC services         | CBO                | 1           | Numeric       |                                                                                           |                       | Constructed with CRFs |                       |
|                        |                              | Private            | 2           |               |                                                                                           |                       |                       |                       |
|                        |                              | Governmental       | 3           |               |                                                                                           |                       |                       |                       |
|                        |                              | TRCARC             | 4           |               |                                                                                           |                       |                       |                       |
|                        |                              | Not disclosed      | 99          |               |                                                                                           |                       |                       |                       |
| <b>linkagecst</b>      | Status Linkages to CST       | Linked             | 1           | Numeric       |                                                                                           | Constructed with CRFs |                       |                       |
|                        |                              | N/A                | 99          |               |                                                                                           |                       |                       |                       |
|                        |                              | LTFU               | 100         |               |                                                                                           |                       |                       |                       |

| Variable Name          | Variable Label                           | Answer Label                                                       | Answer Code            | Variable Type | Notes | Data collection Tools                       |
|------------------------|------------------------------------------|--------------------------------------------------------------------|------------------------|---------------|-------|---------------------------------------------|
| <b>typecstservices</b> | Type of CST services                     | CBO<br>Private<br>Governmental<br>TRCARC<br>Not disclosed          | 1<br>2<br>3<br>4<br>99 | Numeric       |       | Constructed with questions in questionnaire |
| <b>LTFU</b>            | Loss-to-follow up                        | Completed<br>LTFU<br>N/A                                           | 0<br>1<br>99           | Numeric       |       |                                             |
| <b>whereftfu</b>       | Where LTFU happened                      | After Kit delivery<br>Link to HTS services<br>Link to CST services | 1<br>2<br>3            | Numeric       |       |                                             |
| <b>discord</b>         | Discordant test results                  | No<br>Yes<br>N/A                                                   | 0<br>1<br>99           | Numeric       |       |                                             |
| <b>evertested</b>      | Ever been tested for HIV                 | Never<br>Ever<br>No answer                                         | 0<br>1<br>99           | Numeric       |       |                                             |
| <b>firstester</b>      | First-time testers                       | No<br>Yes<br>No answer                                             | 0<br>1<br>99           | Numeric       |       |                                             |
| <b>recentester</b>     | HIV test done in past 6m                 | No<br>Yes<br>No answer                                             | 0<br>1<br>99           | Numeric       |       |                                             |
| <b>frequentester</b>   | Repeat testers > = 2 HIV test past 12m   | No<br>Yes<br>No answer                                             | 0<br>1<br>99           | Numeric       |       |                                             |
| <b>acceptoral</b>      | Acceptability of oral fluid HIVST        | No<br>Yes                                                          | 0<br>1                 | Numeric       |       |                                             |
| <b>intentionhivst</b>  | Intention for unassisted HIVST in future | No<br>Yes<br>No answer                                             | 0<br>1<br>99           | Numeric       |       |                                             |

| Variable Name           | Variable Label                   | Answer Label                                                                                     | Answer Code                      | Variable Type | Notes                         | Data collection Tools |
|-------------------------|----------------------------------|--------------------------------------------------------------------------------------------------|----------------------------------|---------------|-------------------------------|-----------------------|
| <b>q1age_yr</b>         | 1.1.1 Reported Age               | Open ended                                                                                       |                                  | Numeric       |                               |                       |
| <b>age</b>              | reported age                     | Open ended                                                                                       |                                  | Numeric       | Use reported age for analysis |                       |
| <b>age18</b>            | Age groups 18 years              | < 18 years<br>≥ 18 years                                                                         | 1<br>2                           | Numeric       |                               |                       |
| <b>agecat</b>           | Age groups standard              | 15-19 years<br>20-24 years<br>25-29 years<br>> 30 years                                          | 1<br>2<br>3<br>4                 | Numeric       |                               |                       |
| <b>q1howlong_live</b>   | 1.10 Living in this city         | visitor<br><1 month<br>1-12 months<br>>12 months<br>No answer                                    | 1<br>2<br>3<br>4<br>99           | Numeric       |                               |                       |
| <b>q1sexpartner_12m</b> | 1.3 Type partner p12m            | Male<br>Female<br>Both<br>No answer                                                              | 1<br>2<br>3<br>99                | Numeric       |                               |                       |
| <b>q1edu</b>            | 1.4 Highest level educ completed | No schooling<br>Primary<br>Secondary<br>High-school<br>University<br>No answer                   | 0<br>1<br>2<br>3<br>4<br>99      | Numeric       |                               |                       |
| <b>q1occ</b>            | 1.5 Current Occupation           | Unemployed<br>Student<br>Civil servant<br>Self-employee<br>Employee_not GO<br>Other<br>No answer | 0<br>1<br>2<br>3<br>4<br>5<br>99 | Numeric       |                               |                       |

| Variable Name           | Variable Label                                 | Answer Label        | Answer Code | Variable Type | Notes | Data collection Tools |
|-------------------------|------------------------------------------------|---------------------|-------------|---------------|-------|-----------------------|
| <b>q1married</b>        | 1.6 Marital status                             | Married w woman     | 1           | Numeric       |       |                       |
|                         |                                                | Divorced            | 2           |               |       |                       |
|                         |                                                | Widowed             | 3           |               |       |                       |
|                         |                                                | Single              | 4           |               |       |                       |
|                         |                                                | No answer           | 99          |               |       |                       |
| <b>q1no_child</b>       | 1.7 Number of children                         | Open ended          |             | Numeric       |       |                       |
| <b>child</b>            | Have children                                  | No                  | 0           | Numeric       |       |                       |
|                         |                                                | Yes                 | 1           |               |       |                       |
|                         |                                                |                     |             |               |       |                       |
| <b>q1livewith</b>       | 1.8 Living with                                | Alone               | 1           | Numeric       |       |                       |
|                         |                                                | W/friends           | 2           |               |       |                       |
|                         |                                                | W/family            | 3           |               |       |                       |
|                         |                                                | W/reg. femal. part. | 4           |               |       |                       |
|                         |                                                | W/reg. male part.   | 5           |               |       |                       |
|                         |                                                | No answer           | 99          |               |       |                       |
|                         |                                                |                     |             |               |       |                       |
| <b>livealone</b>        | Living alone                                   | No                  | 0           | Numeric       |       |                       |
|                         |                                                | Yes                 | 1           |               |       |                       |
|                         |                                                | No answer           | 99          |               |       |                       |
|                         |                                                |                     |             |               |       |                       |
| <b>q1income</b>         | 1.9 Average monthly income                     | Open ended          |             | long          |       |                       |
| <b>q1income_new</b>     | Cleaned_Average monthly income                 | Open ended          |             | Numeric       |       |                       |
| <b>income</b>           | Monthly average wage 14,000 THB                | Below               | 0           | Numeric       |       |                       |
|                         |                                                | Above               | 1           |               |       |                       |
|                         |                                                | No answer           | 99          |               |       |                       |
|                         |                                                |                     |             |               |       |                       |
| <b>q10nocuredisease</b> | 10.1 Taking a long-term Rx for chronic Disease | No                  | 0           | Numeric       |       |                       |
|                         |                                                | Yes                 | 1           |               |       |                       |
|                         |                                                | No answer           | 99          |               |       |                       |
|                         |                                                |                     |             |               |       |                       |
| <b>q10hormone</b>       | 10.2 Taken/injected hormones p3m               | No                  | 0           | Numeric       |       |                       |
|                         |                                                | Yes                 | 1           |               |       |                       |
|                         |                                                | No answer           | 99          |               |       |                       |
|                         |                                                |                     |             |               |       |                       |

| Variable Name                   | Variable Label                                      | Answer Label     | Answer Code | Variable Type | Notes | Data collection Tools |
|---------------------------------|-----------------------------------------------------|------------------|-------------|---------------|-------|-----------------------|
| <a href="#">q10prep</a>         | 10.3 Ever taken PrEP                                | Never            | 0           | Numeric       |       |                       |
|                                 |                                                     | Past 2 months    | 1           |               |       |                       |
|                                 |                                                     | 2-4 months       | 2           |               |       |                       |
|                                 |                                                     | >4 months        | 3           |               |       |                       |
|                                 |                                                     | IDK              | 97          |               |       |                       |
|                                 |                                                     | No answer        | 99          |               |       |                       |
| <a href="#">q10pep</a>          | 10.4 Ever taken PEP                                 | Never            | 0           | Numeric       |       |                       |
|                                 |                                                     | Past 2 months    | 1           |               |       |                       |
|                                 |                                                     | 2-4 months       | 2           |               |       |                       |
|                                 |                                                     | >4 months        | 3           |               |       |                       |
|                                 |                                                     | IDK              | 97          |               |       |                       |
|                                 |                                                     | No answer        | 99          |               |       |                       |
| <a href="#">q2condom_fem1</a>   | 2.1 Condom Use (CU) last sex w/ fem. reg. part. p3m | No               | 0           | Numeric       |       |                       |
|                                 |                                                     | Yes              | 1           |               |       |                       |
|                                 |                                                     | N/A              | 2           |               |       |                       |
|                                 |                                                     | No answer        | 99          |               |       |                       |
| <a href="#">q2condom_fem2</a>   | 2.2 CU last sex w/fem. cas./SW part. p3m            | No               | 0           | Numeric       |       |                       |
|                                 |                                                     | Yes              | 1           |               |       |                       |
|                                 |                                                     | N/A              | 2           |               |       |                       |
|                                 |                                                     | No answer        | 99          |               |       |                       |
| <a href="#">q2condom_male1</a>  | 2.3 CU last sex w/ male/TG reg. part. p3m           | No               | 0           | Numeric       |       |                       |
|                                 |                                                     | Yes              | 1           |               |       |                       |
|                                 |                                                     | N/A              | 2           |               |       |                       |
|                                 |                                                     | No answer        | 99          |               |       |                       |
| <a href="#">q2condom_male2</a>  | 2.4 CU last sex w/ male/TG cas/SW/client part. p3m  | No               | 0           | Numeric       |       |                       |
|                                 |                                                     | Yes              | 1           |               |       |                       |
|                                 |                                                     | N/A              | 2           |               |       |                       |
|                                 |                                                     | No answer        | 99          |               |       |                       |
| <a href="#">q2confreq_male2</a> | 2.5 Freq CU anal sex w/any male/TG part. p3m        | Never            | 0           | Numeric       |       |                       |
|                                 |                                                     | Sometimes        | 1           |               |       |                       |
|                                 |                                                     | Most of the time | 2           |               |       |                       |
|                                 |                                                     | Always           | 3           |               |       |                       |
|                                 |                                                     | No anal sex p3m  | 4           |               |       |                       |
|                                 |                                                     | No answer        | 99          |               |       |                       |

| Variable Name         | Variable Label                                 | Answer Label      | Answer Code | Variable Type | Notes | Data collection Tools |
|-----------------------|------------------------------------------------|-------------------|-------------|---------------|-------|-----------------------|
| <b>q2sexrole_male</b> | 2.6 Role anal w/ any male part. in p3m         | Insertive         | 1           | Numeric       |       |                       |
|                       |                                                | Both              | 2           |               |       |                       |
|                       |                                                | Receptive         | 3           |               |       |                       |
|                       |                                                | No anal sex p3m   | 4           |               |       |                       |
|                       |                                                | No answer         | 99          |               |       |                       |
| <b>q21stmet_male</b>  | 2.7 Place first met last non-reg. male partner | Social media      | 1           | Numeric       |       |                       |
|                       |                                                | Friend referral   | 2           |               |       |                       |
|                       |                                                | Private party     | 3           |               |       |                       |
|                       |                                                | Private sex party | 4           |               |       |                       |
|                       |                                                | Bar/discotheque   | 5           |               |       |                       |
|                       |                                                | Sauna/massage     | 6           |               |       |                       |
|                       |                                                | open-air          | 7           |               |       |                       |
|                       |                                                | Other             | 8           |               |       |                       |
|                       |                                                | No answer         | 99          |               |       |                       |
| <b>q2receive_gift</b> | 2.8 Received money/goods for sex p3m           | No                | 0           | Numeric       |       |                       |
|                       |                                                | Yes               | 1           |               |       |                       |
|                       |                                                | No answer         | 99          |               |       |                       |
| <b>q2given_gift</b>   | 2.9 Given money/goods for sex p3m              | No                | 0           | Numeric       |       |                       |
|                       |                                                | Yes               | 1           |               |       |                       |
|                       |                                                | No answer         | 99          |               |       |                       |
| <b>q3lasttest</b>     | 3.1 When Last HIV test                         | Never tested      | 0           | Numeric       |       |                       |
|                       |                                                | < 3 months        | 1           |               |       |                       |
|                       |                                                | 3-6 months        | 2           |               |       |                       |
|                       |                                                | 6-12 months       | 3           |               |       |                       |
|                       |                                                | >12 months        | 4           |               |       |                       |
|                       |                                                | No answer         | 99          |               |       |                       |
| <b>q3freqtest_12m</b> | 3.2 Freq. HIV test p12m                        | No tested p12m    | 0           | Numeric       |       |                       |
|                       |                                                | 1 time            | 1           |               |       |                       |
|                       |                                                | 2 times           | 2           |               |       |                       |
|                       |                                                | 3 times           | 3           |               |       |                       |
|                       |                                                | >3 times          | 4           |               |       |                       |
|                       |                                                | No answer         | 99          |               |       |                       |

| Variable Name      | Variable Label                                 | Answer Label          | Answer Code | Variable Type | Notes | Data collection Tools |
|--------------------|------------------------------------------------|-----------------------|-------------|---------------|-------|-----------------------|
| <b>q3testplace</b> | 3.3 Place of last HIV test                     | Never tested          | 0           | Numeric       |       |                       |
|                    |                                                | DIC                   | 1           |               |       |                       |
|                    |                                                | Private               | 2           |               |       |                       |
|                    |                                                | TRC                   | 3           |               |       |                       |
|                    |                                                | GO hospital           | 4           |               |       |                       |
|                    |                                                | Mobile services       | 5           |               |       |                       |
|                    |                                                | research/IBBS         | 6           |               |       |                       |
|                    |                                                | Other                 | 7           |               |       |                       |
| No answer          | 99                                             |                       |             |               |       |                       |
| <b>q7pay400b</b>   | 7.3 WtP 400 THB for HIVST kit                  | No                    | 0           | Numeric       |       |                       |
|                    |                                                | Yes                   | 1           |               |       |                       |
|                    |                                                | IDK                   | 97          |               |       |                       |
|                    |                                                | No answer             | 99          |               |       |                       |
| <b>q7pay500b</b>   | 7.4 WtP medium increase 500 THB for HIVST kit  | No                    | 0           | Numeric       |       |                       |
|                    |                                                | Yes                   | 1           |               |       |                       |
|                    |                                                | IDK                   | 97          |               |       |                       |
|                    |                                                | No answer             | 99          |               |       |                       |
| <b>q7payif</b>     | 7.5 WtP higher or lower increase for HIVST kit | Lower increase        | 1           | Numeric       |       |                       |
|                    |                                                | Higher increase       | 2           |               |       |                       |
|                    |                                                | IDK                   | 97          |               |       |                       |
|                    |                                                | No answer             | 99          |               |       |                       |
| <b>q7pay_max</b>   | 7.6 Highest price WtP for HIVST kit            | Open ended            |             | Integer       |       |                       |
| <b>q7do_what</b>   | 7.7 If the price HIVST is too high, I will     | No HIV test           | 1           | Numeric       |       |                       |
|                    |                                                | GO/CBO free services  | 2           |               |       |                       |
|                    |                                                | Private paid services | 3           |               |       |                       |
|                    |                                                | IDK                   | 97          |               |       |                       |
|                    |                                                | No answer             | 99          |               |       |                       |



| Variable Name          | Variable Label                                           | Answer Label | Answer Code          | Variable Type | Notes | Data collection Tools |
|------------------------|----------------------------------------------------------|--------------|----------------------|---------------|-------|-----------------------|
| <b>q7deliveryplace</b> | 7.8 Preferred delivery point for HIVST                   |              |                      | Numeric       |       |                       |
|                        |                                                          |              | CBO                  | 1             |       |                       |
|                        |                                                          |              | GO facility          | 2             |       |                       |
|                        |                                                          |              | Pharmacy             | 3             |       |                       |
|                        |                                                          |              | Private              | 4             |       |                       |
|                        |                                                          |              | CBS                  | 5             |       |                       |
|                        |                                                          |              | EMS/CBO              | 6             |       |                       |
|                        |                                                          |              | EMS/Internet         | 7             |       |                       |
|                        |                                                          |              | 7/11-type shop       | 8             |       |                       |
|                        |                                                          |              | Sauna/Massage        | 9             |       |                       |
|                        |                                                          |              | Other                | 10            |       |                       |
|                        | IDK                                                      | 97           |                      |               |       |                       |
|                        | No answer                                                | 99           |                      |               |       |                       |
| <b>q7likemost</b>      | 7.9 Preferred type of HIVST                              |              |                      | Numeric       |       |                       |
|                        |                                                          |              | Oral fluid           | 1             |       |                       |
|                        |                                                          |              | Finger prick         | 2             |       |                       |
|                        |                                                          |              | Any                  | 3             |       |                       |
|                        |                                                          |              | not interested HIVST | 4             |       |                       |
|                        |                                                          |              | IDK                  | 97            |       |                       |
|                        | No answer                                                | 99           |                      |               |       |                       |
| <b>druguser</b>        | Reported any drug use past 12m                           |              |                      | Numeric       |       |                       |
|                        |                                                          |              | No                   | 0             |       |                       |
|                        |                                                          |              | Yes                  | 1             |       |                       |
|                        | No answer                                                | 99           |                      |               |       |                       |
| <b>q8ever_idu</b>      | 8.1 Ever injected drugs                                  |              |                      | Numeric       |       |                       |
|                        |                                                          |              | Never                | 0             |       |                       |
|                        |                                                          |              | Past 3 months        | 1             |       |                       |
|                        |                                                          |              | 3-12 months          | 2             |       |                       |
|                        |                                                          |              | >1 year              | 3             |       |                       |
|                        | No answer                                                | 99           |                      |               |       |                       |
| <b>q8ever_drug</b>     | 8.2 Ever swallowed/smoked/snorted drugs                  |              |                      | Numeric       |       |                       |
|                        |                                                          |              | Never                | 0             |       |                       |
|                        |                                                          |              | Past 3 months        | 1             |       |                       |
|                        |                                                          |              | 3-12 months          | 2             |       |                       |
|                        |                                                          |              | >1 year              | 3             |       |                       |
|                        | No answer                                                | 99           |                      |               |       |                       |
| <b>q9hivtalk</b>       | 9.1 Participated HIV prevention activities p12m with CBO |              |                      | Numeric       |       |                       |
|                        |                                                          |              | Never                | 0             |       |                       |
|                        |                                                          |              | 1 time               | 1             |       |                       |
|                        |                                                          |              | 2 times              | 2             |       |                       |
|                        |                                                          |              | 3 times              | 3             |       |                       |
|                        |                                                          |              | > 3 times            | 4             |       |                       |
|                        |                                                          |              | IDK                  | 97            |       |                       |
|                        |                                                          |              | No answer            | 99            |       |                       |

| Variable Name  | Variable Label                                                  | Answer Label       | Answer Code | Variable Type | Notes | Data collection Tools      |
|----------------|-----------------------------------------------------------------|--------------------|-------------|---------------|-------|----------------------------|
| q12friend_test | 12.5 scale Likely recommend HIVST to friends                    | Extremely unlikely | 1           | Numeric       |       |                            |
|                |                                                                 | Unlikely           | 2           |               |       |                            |
|                |                                                                 | Neutral            | 3           |               |       |                            |
|                |                                                                 | Likely             | 4           |               |       |                            |
|                |                                                                 | Extremely likely   | 5           |               |       |                            |
|                |                                                                 | IDK                | 97          |               |       |                            |
|                |                                                                 | No answer          | 99          |               |       |                            |
| placemeetmale  | Place met last male _recoded                                    |                    |             | Numeric       |       |                            |
|                |                                                                 | Social media       | 1           |               |       |                            |
|                |                                                                 | Private space      | 2           |               |       |                            |
|                |                                                                 | Public space       | 3           |               |       |                            |
|                |                                                                 | Semi-public space  | 4           |               |       |                            |
|                |                                                                 | Other              | 5           |               |       |                            |
|                |                                                                 | No answer          | 99          |               |       |                            |
| exposedcbo     | Exposed to CBO past 12m                                         |                    |             | Numeric       |       |                            |
|                |                                                                 | No                 | 0           |               |       |                            |
|                |                                                                 | Yes                | 1           |               |       |                            |
|                |                                                                 | No answer          | 99          |               |       |                            |
| stress         | Reported emotional/cognitive stress after HIVST                 |                    |             | Numeric       |       | Constructed with CRF on AE |
|                |                                                                 | No                 | 0           |               |       |                            |
|                |                                                                 | Yes                | 1           |               |       |                            |
| nssi           | Reported non-suicidal self-injury after HIVST                   |                    |             | Numeric       |       |                            |
|                |                                                                 | No                 | 0           |               |       |                            |
|                |                                                                 | Yes                | 1           |               |       |                            |
| nssi           | Reported non-suicidal self-injury after HIVST                   |                    |             | Numeric       |       |                            |
|                |                                                                 | No                 | 0           |               |       |                            |
|                |                                                                 | Yes                | 1           |               |       |                            |
| suicideidea    | Reported suicidal ideation after HIVST                          |                    |             | Numeric       |       |                            |
|                |                                                                 | No                 | 0           |               |       |                            |
|                |                                                                 | Yes                | 1           |               |       |                            |
| suicide        | Reported suicidal attempt after HIVST                           |                    |             | Numeric       |       |                            |
|                |                                                                 | No                 | 0           |               |       |                            |
|                |                                                                 | Yes                | 1           |               |       |                            |
| binging        | Reported substance binging (drug/alcohol) after HIVST           |                    |             | Numeric       |       |                            |
|                |                                                                 | No                 | 0           |               |       |                            |
|                |                                                                 | Yes                | 1           |               |       |                            |
| socalharm      | Reported substance social harm after HIVST                      |                    |             | Numeric       |       |                            |
|                |                                                                 | No                 | 0           |               |       |                            |
|                |                                                                 | Yes                | 1           |               |       |                            |
| anyae          | Reported at least one adverse event (listed above) after HIVST  |                    |             | Numeric       |       |                            |
|                |                                                                 | No                 | 0           |               |       |                            |
|                |                                                                 | Yes                | 1           |               |       |                            |
| multiprae      | Reported more than one adverse event (listed above) after HIVST |                    |             | Numeric       |       |                            |
|                |                                                                 | No                 | 0           |               |       |                            |
|                |                                                                 | Yes                | 1           |               |       |                            |
